# Supplementary material for: Analytical methods for identifying sequences of utilization in health data: a scoping review
Source: Springer Nature journal article supplement (doi:10.1186/s12874-023-02019-y), 2023-09-27
Supplement: MOESM1 [file 26095432]

## **Additional File 1: Search strategy**

Part I: Eligibility criteria (includes Inclusion and Exclusion criteria)

Part II: Full Search Strategies

Part III: Calculation of Cohen's Kappa

### **Part I: Eligibility criteria (includes Inclusion and Exclusion criteria)**

#### **PICO-Scheme:**

**Population:** Individuals whose health data are processed. No restriction in human population (patients, insured persons, other persons). No limitation on age, origin, morbidity and sex of population.

**Intervention:** Application or presentation of an implemented method that examines health data in terms of care sequences.

**Comparison:** No comparison.

**Outcome:** No specific outcome.

#### **Inclusion:**

Time: 01/01/2000 – 16/03/2021

Language: English

Databases: PubMed, Web Of Science, EconLit, Scopus

Setting: Health Care Sector.

Further criteria:

1. Database: Method must be applied to real world data, which include health care utilization data (e.g. Electronic Health Records, Medical Health Records, Claims data). Data must be individual patient-related data.
2. Method: The method used must be at least roughly described or, if it is a known method, named. Applied Method must consider the chronology of events. Considered events must include events of utilization.
3. Results: Sequences of care have to be presented in any way. Sketches and sections of the results are sufficient. A chronological sequence of events must be observed.

#### **Exclusion:**

Type of publication: No limitation.

Further criteria:

1. Data: Studies using Datasets of only medical values are excluded. Aggregated data in terms of time or populations (no individual patient-related data). Qualitative databases e.g. from questionnaires.
2. Method: Methods which are not explained or named at all. Methods of pattern recognition in terms of imaging techniques or text recognition. Purely technical articles without practical application.
3. Results: Results do not consider chronological order of events. All types of presentations are accepted.

## Part II: Full Search Strategies

### Databases searched

Table 1: Overview of the search for matching articles in the databases.

| Database                        | Date       | Number of articles |
|---------------------------------|------------|--------------------|
| Medline via PubMed              | 16/03/2021 | 840                |
| Scopus                          | 16/03/2021 | 2641               |
| Web of Science                  | 16/03/2021 | 856                |
| EconLit                         | 16/03/2021 | 6                  |
| Total (incl. Duplicates)        |            | 4343               |
| <b>Total (excl. Duplicates)</b> |            | <b>2865</b>        |

### General structure of search strategy

Table 2: Overview of the search strategy divided into the three subcategories: type of data, type of information and type of method.

| 1) type of data                                                                         | 2) type of information                                                                                                                                                                       |                                                                                                                                                             | 3) type of method                                                                                                                                                                                                                                                                                                                           |
|-----------------------------------------------------------------------------------------|----------------------------------------------------------------------------------------------------------------------------------------------------------------------------------------------|-------------------------------------------------------------------------------------------------------------------------------------------------------------|---------------------------------------------------------------------------------------------------------------------------------------------------------------------------------------------------------------------------------------------------------------------------------------------------------------------------------------------|
|                                                                                         | a)                                                                                                                                                                                           | b)                                                                                                                                                          |                                                                                                                                                                                                                                                                                                                                             |
| administrative data<br>/<br>administrative<br>database /<br>administrative<br>databases | patient /patients<br>care<br>clinical<br>ambulatory<br>treatment /<br>treatments<br>health<br>healthcare<br>stationary<br>hospital<br>inpatient<br>outpatient<br>utilization/<br>utilisation | trajectory/<br>trajectories<br>sequence /<br>sequences<br>sequential<br>pattern/<br>patterns<br>pathway/<br>pathways<br>journey/<br>journeys<br>path/ paths | algorithm mining /<br>mining algorithms<br>technique mining /<br>mining techniques<br>process mining / mining<br>processes<br>pattern mining / mining patterns<br>itemset mining / mining itemsets<br>string mining / mining strings<br>sequence mining / mining<br>sequences<br>event mining / mining events<br>rule mining / mining rules |
| pharmacy claims                                                                         |                                                                                                                                                                                              |                                                                                                                                                             | data mining / mining data<br>data classification<br>data summarization<br>data summarisation                                                                                                                                                                                                                                                |
| electronic health<br>record / electronic<br>health records                              |                                                                                                                                                                                              |                                                                                                                                                             | supervised learning<br>unsupervised learning<br>machine learning / machine-<br>learning<br>deep learning                                                                                                                                                                                                                                    |
| insurance claims                                                                        |                                                                                                                                                                                              |                                                                                                                                                             | clustering /<br>cluster /clusters                                                                                                                                                                                                                                                                                                           |
| claims data /<br>claims database /<br>claims databases                                  |                                                                                                                                                                                              |                                                                                                                                                             | neural network /neural networks                                                                                                                                                                                                                                                                                                             |
| patient data                                                                            |                                                                                                                                                                                              |                                                                                                                                                             | decision tree / decision trees                                                                                                                                                                                                                                                                                                              |
| real-world data /<br>real world data                                                    |                                                                                                                                                                                              |                                                                                                                                                             | patient pathway analysis /<br>patient-pathway analysis /<br>patient pathway analyses /<br>patient-pathway analyses                                                                                                                                                                                                                          |

Additional File 1: Search strategy

|                                            |  |                                                   |
|--------------------------------------------|--|---------------------------------------------------|
| routine data /<br>database<br>/databases   |  | support vector machine<br>support vector machines |
| patient record /<br>records                |  | sequence analysis / sequence<br>analyses          |
| insurance data /<br>database<br>/databases |  |                                                   |
| medical record /<br>medical records        |  |                                                   |
| administrative<br>claims                   |  |                                                   |

**Specific search strategy per database**

Table 3: Exact search strategy in the PubMed database.

| <b>Database: PubMed</b>        |                                                                                                                                                                                                                                                                                                                                                                                                                                                                                                                                                                                                                                                                                                                                                                                                                                                                                                                                                                                                                                                                          |            |
|--------------------------------|--------------------------------------------------------------------------------------------------------------------------------------------------------------------------------------------------------------------------------------------------------------------------------------------------------------------------------------------------------------------------------------------------------------------------------------------------------------------------------------------------------------------------------------------------------------------------------------------------------------------------------------------------------------------------------------------------------------------------------------------------------------------------------------------------------------------------------------------------------------------------------------------------------------------------------------------------------------------------------------------------------------------------------------------------------------------------|------------|
| <b>Search Date: 16.03.2021</b> |                                                                                                                                                                                                                                                                                                                                                                                                                                                                                                                                                                                                                                                                                                                                                                                                                                                                                                                                                                                                                                                                          |            |
|                                | <b>Search Strategy: 1 AND 2a AND 2b AND 3 AND R</b>                                                                                                                                                                                                                                                                                                                                                                                                                                                                                                                                                                                                                                                                                                                                                                                                                                                                                                                                                                                                                      | <b>840</b> |
| <b>1</b>                       | (<br>("administrative data"[Title/Abstract]) OR ("administrative<br>database"[Title/Abstract]) OR ("administrative databases"[Title/Abstract]) OR<br>("administrative claims"[Title/Abstract]) OR<br>("pharmacy claims"[Title/Abstract]) OR<br>("electronic health record"[Title/Abstract]) OR ("electronic health<br>records"[Title/Abstract]) OR ("insurance claims"[Title/Abstract]) OR<br>("claims data"[Title/Abstract]) OR ("claims database"[Title/Abstract]) OR<br>("claims databases"[Title/Abstract]) OR<br>("patient data"[Title/Abstract]) OR<br>("real-world data"[Title/Abstract]) OR ("real world data"[Title/Abstract]) OR<br>("routine data"[Title/Abstract]) OR ("routine database"[Title/Abstract]) OR<br>("routine databases"[Title/Abstract]) OR<br>("patient record"[Title/Abstract]) OR ("patient records"[Title/Abstract]) OR<br>("medical record"[Title/Abstract]) OR ("medical records"[Title/Abstract]) OR<br>("insurance data"[Title/Abstract]) OR ("insurance database"[Title/Abstract])<br>OR ("insurance databases"[Title/Abstract])<br>) |            |
| <b>2 a</b>                     | ( "healthcare"[Title/Abstract] OR "patient"[Title/Abstract] OR<br>"patients"[Title/Abstract] OR "care"[Title/Abstract] OR "clinical"[Title/Abstract]<br>OR "hospital"[Title/Abstract] OR "ambulatory"[Title/Abstract] OR<br>"treatment"[Title/Abstract] OR "treatments"[Title/Abstract] OR<br>"health"[Title/Abstract] OR "stationary"[Title/Abstract] OR<br>"utilization"[Title/Abstract] OR "utilisation"[Title/Abstract] OR<br>"inpatient"[Title/Abstract] OR "outpatient"[Title/Abstract]<br>)                                                                                                                                                                                                                                                                                                                                                                                                                                                                                                                                                                       |            |
| <b>2 b</b>                     | ( "sequences"[Title/Abstract] OR "sequence"[Title/Abstract] OR<br>"patterns"[Title/Abstract] OR "pattern"[Title/Abstract] OR<br>"pathways"[Title/Abstract] OR "pathway"[Title/Abstract] OR<br>"journeys"[Title/Abstract] OR "journey"[Title/Abstract] OR<br>"paths"[Title/Abstract] OR "path"[Title/Abstract] OR                                                                                                                                                                                                                                                                                                                                                                                                                                                                                                                                                                                                                                                                                                                                                         |            |

Additional File 1: Search strategy

|          |                                                                                                                                                                                                                                                                                                                                                                                                                                                                                                                                                                                                                                                                                                                                                                                                                                                                                                                                                                                                                                                                                                                                                                                                                                                                                                                                                                                                                                                                                                                                                                                                                                 |  |
|----------|---------------------------------------------------------------------------------------------------------------------------------------------------------------------------------------------------------------------------------------------------------------------------------------------------------------------------------------------------------------------------------------------------------------------------------------------------------------------------------------------------------------------------------------------------------------------------------------------------------------------------------------------------------------------------------------------------------------------------------------------------------------------------------------------------------------------------------------------------------------------------------------------------------------------------------------------------------------------------------------------------------------------------------------------------------------------------------------------------------------------------------------------------------------------------------------------------------------------------------------------------------------------------------------------------------------------------------------------------------------------------------------------------------------------------------------------------------------------------------------------------------------------------------------------------------------------------------------------------------------------------------|--|
|          | "trajectory"[Title/Abstract] OR "trajectories"[Title/Abstract] OR "sequential"[Title/Abstract]<br>)                                                                                                                                                                                                                                                                                                                                                                                                                                                                                                                                                                                                                                                                                                                                                                                                                                                                                                                                                                                                                                                                                                                                                                                                                                                                                                                                                                                                                                                                                                                             |  |
| <b>3</b> | ( "algorithm mining"[Title/Abstract] OR "mining algorithms"[Title/Abstract] OR "event mining"[Title/Abstract] OR "mining events"[Title/Abstract] OR "rule mining"[Title/Abstract] OR "mining rules"[Title/Abstract] OR "technique mining"[Title/Abstract] OR "mining techniques"[Title/Abstract] OR "process mining"[Title/Abstract] OR "mining processes"[Title/Abstract] OR "pattern mining"[Title/Abstract] OR "mining patterns"[Title/Abstract] OR "itemset mining"[Title/Abstract] OR "mining itemsets"[Title/Abstract] OR "string mining"[Title/Abstract] OR "mining strings"[Title/Abstract] OR "sequence mining "[Title/Abstract] OR "mining sequences"[Title/Abstract] OR "data mining"[Title/Abstract] OR "mining data"[Title/Abstract] OR "data classification"[Title/Abstract] OR "data summarization"[Title/Abstract] OR "data summarisation"[Title/Abstract] OR "supervised learning"[Title/Abstract] OR "unsupervised learning"[Title/Abstract] OR "machine learning"[Title/Abstract] OR "machine-learning"[Title/Abstract] OR "deep learning"[Title/Abstract] OR "clustering"[Title/Abstract] OR "neural network"[Title/Abstract] OR "neural networks"[Title/Abstract] OR "decision tree"[Title/Abstract] OR "decision trees"[Title/Abstract] OR "support vector machine"[Title/Abstract] OR "support vector machines"[Title/Abstract] OR "patient pathway analysis"[Title/Abstract] OR "patient pathway analyses"[Title/Abstract] OR "patient-pathway analysis"[Title/Abstract] OR "patient-pathway analyses"[Title/Abstract] OR "sequence analysis" [Title/Abstract] OR "sequence analyses" [Title/Abstract]) |  |
| <b>R</b> | (english[Filter] OR german[Filter]) AND (2000:2021[pdat])                                                                                                                                                                                                                                                                                                                                                                                                                                                                                                                                                                                                                                                                                                                                                                                                                                                                                                                                                                                                                                                                                                                                                                                                                                                                                                                                                                                                                                                                                                                                                                       |  |

Table 4: Exact search strategy in the Scopus database.

|            |                                                                                                                                                                                                                                                                                                                                                                                                                                                                                                                                                                                    |              |
|------------|------------------------------------------------------------------------------------------------------------------------------------------------------------------------------------------------------------------------------------------------------------------------------------------------------------------------------------------------------------------------------------------------------------------------------------------------------------------------------------------------------------------------------------------------------------------------------------|--------------|
|            | <b>Database: Scopus</b>                                                                                                                                                                                                                                                                                                                                                                                                                                                                                                                                                            |              |
|            | <b>Search Date: 16.03.2021</b>                                                                                                                                                                                                                                                                                                                                                                                                                                                                                                                                                     |              |
|            | <b>Complete Search Strategy: Search 1 AND Search 2</b>                                                                                                                                                                                                                                                                                                                                                                                                                                                                                                                             | <b>2,641</b> |
|            | Search 1: 1 AND 2a AND 2b AND 3 AND R1                                                                                                                                                                                                                                                                                                                                                                                                                                                                                                                                             | 1,149        |
|            | Search 2: 1 AND 2a AND 2b AND 3 AND R2                                                                                                                                                                                                                                                                                                                                                                                                                                                                                                                                             | 1,492        |
| <b>1</b>   | TITLE-ABS-KEY ( {administrative data} OR {administrative database} OR {administrative databases} OR {administrative claims} OR {pharmacy claims} OR {electronic health record} OR {electronic health records} OR {insurance claims} OR {claims data} OR {claims database} OR {claims databases} OR {patient data} OR {realworld data} OR {real world data} OR {routine data} OR {routine database} OR {routine databases} OR {patient record} OR {patient records} OR {medical record} OR {medical records} OR {insurance data} OR {insurance database} OR {insurance databases} ) |              |
| <b>2 a</b> | TITLE-ABS-KEY ( {healthcare} OR {patient} OR {patients} OR {care} OR {clinical} OR {hospital} OR {ambulatory} OR {treatment} OR {treatments} OR {health} OR {stationary} OR {utilization} OR {utilisation} OR {inpatient} OR {outpatient} )                                                                                                                                                                                                                                                                                                                                        |              |
| <b>2 b</b> | TITLE-ABS-KEY ( {sequences} OR {sequence} OR {patterns} OR {pattern} OR {pathways} OR {pathway} OR {journeys} OR {journey} OR {paths} OR {path} OR {trajectory} OR {trajectories} OR {sequential} )                                                                                                                                                                                                                                                                                                                                                                                |              |
| <b>3</b>   | TITLE-ABS-KEY ( {algorithm mining} OR {mining algorithms} OR {event mining} OR {mining events} OR {rule mining} OR {mining rules} OR {technique mining} OR {mining techniques} OR {process mining} OR {mining processes} OR {pattern mining} OR {mining patterns} OR                                                                                                                                                                                                                                                                                                               |              |

Additional File 1: Search strategy

|           |                                                                                                                                                                                                                                                                                                                                                                                                                                                                                                                                                                                                                                                                                               |  |
|-----------|-----------------------------------------------------------------------------------------------------------------------------------------------------------------------------------------------------------------------------------------------------------------------------------------------------------------------------------------------------------------------------------------------------------------------------------------------------------------------------------------------------------------------------------------------------------------------------------------------------------------------------------------------------------------------------------------------|--|
|           | {itemset mining} OR {mining itemsets} OR {string mining} OR {mining strings} OR {sequence mining } OR {mining sequences} OR {data mining} OR {mining data} OR {data classification} OR {data summarization} OR {data summarisation} OR {supervised learning} OR {unsupervised learning} OR {machine learning} OR {machine - learning} OR {deep learning} OR {clustering} OR {neural network} OR {neural networks} OR {decision tree} OR {decision trees} OR {support vector machine} OR {support vector machines} OR {patient pathway analysis} OR {patient pathway analyses} OR {patient - pathway analysis} OR {patient - pathway analyses} OR {sequence analysis} OR {sequence analyses} ) |  |
| <b>R1</b> | LANGUAGE ( english OR german )<br>AND PUBYEAR > 1999 AND PUBYEAR < 2016                                                                                                                                                                                                                                                                                                                                                                                                                                                                                                                                                                                                                       |  |
| <b>R2</b> | AND LANGUAGE ( english OR german )<br>AND PUBYEAR > 2015                                                                                                                                                                                                                                                                                                                                                                                                                                                                                                                                                                                                                                      |  |

Table 5: Exact search strategy in the EconLit database.

|            |                                                                                                                                                                                                                                                                                                                                                                                                                                                                                                                                                                                  |          |
|------------|----------------------------------------------------------------------------------------------------------------------------------------------------------------------------------------------------------------------------------------------------------------------------------------------------------------------------------------------------------------------------------------------------------------------------------------------------------------------------------------------------------------------------------------------------------------------------------|----------|
|            | <b>Database: EconLit</b>                                                                                                                                                                                                                                                                                                                                                                                                                                                                                                                                                         |          |
|            | <b>Search Date: 16.03.2021</b>                                                                                                                                                                                                                                                                                                                                                                                                                                                                                                                                                   |          |
|            | <b>Search Strategy: 1 AND 2a AND 2b AND 3 AND R</b>                                                                                                                                                                                                                                                                                                                                                                                                                                                                                                                              | <b>6</b> |
| <b>1</b>   | AB (<br>("administrative data" OR "administrative database" OR "administrative databases" OR "administrative claims" OR "pharmacy claims" OR "electronic health record" OR "electronic health records" OR "insurance claims" OR "claims data" OR "claims database" OR "claims databases" OR "patient data" OR "real-world data" OR "real world data" OR "routine data" OR "routine database" OR "routine databases" OR "patient record" OR "patient records" OR "medical record" OR "medical records" OR "insurance data" OR "insurance database" OR "insurance databases")<br>) |          |
| <b>2 a</b> | AB (<br>("healthcare" OR "patient" OR "patients" OR "care" OR "clinical" OR "hospital" OR "ambulatory" OR "treatment" OR "treatments" OR "health" OR "stationary" OR "utilization" OR "utilisation" OR "inpatient" OR "outpatient")<br>)                                                                                                                                                                                                                                                                                                                                         |          |
| <b>2 b</b> | AB (<br>("sequences" OR "sequence" OR "patterns" OR "pattern" OR "pathways" OR "pathway" OR "journeys" OR "journey" OR "paths" OR "path" OR "trajectory" OR "trajectories" OR "sequential")<br>)                                                                                                                                                                                                                                                                                                                                                                                 |          |
| <b>3</b>   | AB (<br>("algorithm mining" OR "mining algorithms" OR "event mining" OR "mining events" OR "rule mining" OR "mining rules" OR "technique mining" OR "mining techniques" OR "process mining" OR "mining processes" OR "pattern mining" OR "mining patterns" OR "itemset mining" OR "mining itemsets" OR "string mining" OR "mining strings" OR "sequence mining" OR "mining sequences" OR "data mining" OR "mining data" OR "data classification" OR                                                                                                                              |          |

Additional File 1: Search strategy

|          |                                                                                                                                                                                                                                                                                                                                                                                                                                                                                                                            |  |
|----------|----------------------------------------------------------------------------------------------------------------------------------------------------------------------------------------------------------------------------------------------------------------------------------------------------------------------------------------------------------------------------------------------------------------------------------------------------------------------------------------------------------------------------|--|
|          | "data summarization" OR "data summarisation" OR<br>"supervised learning" OR "unsupervised learning" OR<br>"machine learning" OR "machine-learning" OR<br>"deep learning" OR "clustering" OR "neural network" OR "neural<br>networks" OR "decision tree" OR "decision trees" OR "support vector<br>machine" OR "support vector machines" OR "patient pathway analysis"<br>OR "patient pathway analyses" OR "patient-pathway analysis" OR "patient-<br>pathway analyses" OR "sequence analysis" OR "sequence analyses")<br>) |  |
| <b>R</b> | LA ( (english OR german) )<br><b>Limiters</b> - Published Date: 20000101-20210331<br><b>Search modes</b> - Find any of my search terms                                                                                                                                                                                                                                                                                                                                                                                     |  |

Table 6: Exact search strategy in the Web of Science database.

|            |                                                                                                                                                                                                                                                                                                                                                                                                                                                                                                                                                                                                                   |            |
|------------|-------------------------------------------------------------------------------------------------------------------------------------------------------------------------------------------------------------------------------------------------------------------------------------------------------------------------------------------------------------------------------------------------------------------------------------------------------------------------------------------------------------------------------------------------------------------------------------------------------------------|------------|
|            | <b>Database: Web of Science</b>                                                                                                                                                                                                                                                                                                                                                                                                                                                                                                                                                                                   |            |
|            | <b>Search Date: 16.03.2021</b>                                                                                                                                                                                                                                                                                                                                                                                                                                                                                                                                                                                    |            |
|            | <b>Search Strategy: 1 AND 2a AND 2b AND 3 AND R</b>                                                                                                                                                                                                                                                                                                                                                                                                                                                                                                                                                               | <b>856</b> |
| <b>1</b>   | TOPIC: (<br>("administrative data" OR "administrative database" OR "administrative<br>databases" OR "administrative claims" OR<br>"pharmacy claims" OR<br>"electronic health record" OR "electronic health records" OR<br>"insurance claims" OR<br>"claims data" OR "claims database" OR "claims databases" OR<br>"patient data" OR<br>"real-world data" OR "real world data" OR<br>"routine data" OR "routine database" OR "routine databases" OR<br>"patient record" OR "patient records" OR<br>"medical record" OR "medical records" OR<br>"insurance data" OR "insurance database" OR "insurance databases")) |            |
| <b>2 a</b> | TOPIC: (<br>("healthcare" OR "patient" OR "patients" OR "care" OR "clinical" OR<br>"hospital" OR "ambulatory" OR "treatment" OR "treatments" OR<br>"health" OR "stationary" OR "utilization" OR "utilisation" OR<br>"inpatient" OR "outpatient")<br>)                                                                                                                                                                                                                                                                                                                                                             |            |
| <b>2 b</b> | TOPIC: (<br>("sequences" OR "sequence" OR<br>"patterns" OR "pattern" OR<br>"pathways" OR "pathway" OR<br>"journeys" OR "journey" OR<br>"paths" OR "path" OR<br>"trajectory" OR "trajectories" OR<br>"sequential")<br>)                                                                                                                                                                                                                                                                                                                                                                                            |            |
| <b>3</b>   | TOPIC: (<br>("algorithm mining" OR "mining algorithms" OR<br>"event mining" OR "mining events" OR<br>"rule mining" OR "mining rules" OR<br>"technique mining" OR "mining techniques" OR<br>"process mining" OR "mining processes" OR<br>"pattern mining" OR "mining patterns" OR                                                                                                                                                                                                                                                                                                                                  |            |

Additional File 1: Search strategy

|          |                                                                                                                                                                                                                                                                                                                                                                                                                                                                                                                                                                                                                                                                                                                                       |  |
|----------|---------------------------------------------------------------------------------------------------------------------------------------------------------------------------------------------------------------------------------------------------------------------------------------------------------------------------------------------------------------------------------------------------------------------------------------------------------------------------------------------------------------------------------------------------------------------------------------------------------------------------------------------------------------------------------------------------------------------------------------|--|
|          | "itemset mining" OR "mining itemsets" OR<br>"string mining" OR "mining strings" OR<br>"sequence mining " OR "mining sequences" OR<br>"data mining" OR "mining data" OR<br>"data classification" OR<br>"data summarization" OR "data summarisation" OR<br>"supervised learning" OR "unsupervised learning" OR<br>"machine learning" OR "machine-learning" OR<br>"deep learning" OR "clustering" OR<br>"neural network" OR "neural networks" OR<br>"decision tree" OR "decision trees" OR<br>"support vector machine" OR "support vector machines" OR<br>"patient pathway analysis" OR "patient pathway analyses" OR<br>"patient-pathway analysis" OR "patient-pathway analyses" OR<br>"sequence analysis" OR "sequence analyses")<br>) |  |
| <b>R</b> | LANGUAGE: (English OR German)<br>Timespan: 2000-2021. Indexes: SCI-EXPANDED, SSCI                                                                                                                                                                                                                                                                                                                                                                                                                                                                                                                                                                                                                                                     |  |

**PART III: Calculation of Cohen’s Kappa**

Phase 1:

Decisions of the two reviewers in stage one: Screening of abstracts and titles.

*Table 7: Overview of the inclusion and exclusion decisions of the two reviewers (A.F. and A.N.) in the first decision phase.*

| reviewers | decision | A.N. |      |             |
|-----------|----------|------|------|-------------|
|           |          | IN   | OUT  |             |
| A.F.      | IN       | 98   | 17   | 115         |
|           | OUT      | 23   | 2727 | 2750        |
|           |          | 121  | 2744 | <b>2865</b> |

Kappa = 0.8232 which corresponds to 82 %.

Phase 2:

Decisions of the two reviewers in stage two: Screening of the full texts.

*Table 8: Overview of the inclusion and exclusion decisions of the two reviewers (A.F. and A.N.) in the second decision phase.*

| reviewers | decision | A.N. |     |            |
|-----------|----------|------|-----|------------|
|           |          | IN   | OUT |            |
| A.F.      | IN       | 48   | 7   | 55         |
|           | OUT      | 3    | 62  | 65         |
|           |          | 51   | 69  | <b>120</b> |

Kappa = 0.8312 which corresponds to 83 %.
