# Supplementary material for: Analytical methods for identifying sequences of utilization in health data: a scoping review
Source: Springer Nature journal article supplement (doi:10.1186/s12874-023-02019-y), 2023-09-27
Supplement: MOESM2 [file 26095432]

Additional File 2: Data Extraction of the included studies

Table 1: Extracted Information on Data Source, Setting and Population in the included studies.

| Study                | Type of data                     | Classification | Data horizon   | Date of first data collection | Population size | origin of data / population | characteristic of population                                                                                                                                                                                                                                                                                  | corresponding ICD-10 chapter |
|----------------------|----------------------------------|----------------|----------------|-------------------------------|-----------------|-----------------------------|---------------------------------------------------------------------------------------------------------------------------------------------------------------------------------------------------------------------------------------------------------------------------------------------------------------|------------------------------|
| Alharbi et al., 2018 | US hospital database (MIMIC-III) | MIMIC-III      | not named      | not named                     | 356             | USA                         | altered mental status                                                                                                                                                                                                                                                                                         | 18                           |
| Baker et al., 2017   | EHR - cancer specific            | EHR            | about 10 years | 2004                          | 955             | UK                          | cancer (diagnosis of metastatic breast cancer and received adjuvant epirubicin and cyclophosphamide chemotherapy or (ii) colorectal cancer and received palliative oxaliplatin and infusional 5-fluorouracil chemotherapy, and (iii) were first diagnosed with cancer between January 2004 and February 2013) | 2                            |

Additional File 2: Data Extraction of the included studies

| Study                       | Type of data                                | Classification | Data horizon | Date of first data collection | Population size | origin of data / population | characteristic of population                                                   | corresponding ICD-10 chapter |
|-----------------------------|---------------------------------------------|----------------|--------------|-------------------------------|-----------------|-----------------------------|--------------------------------------------------------------------------------|------------------------------|
| Boborske et al., 2020       | claims data                                 | claims data    | 79 months    | 2012                          | 9,981           | USA                         | back pain (patients who follow conservative back pain guidelines)              | 13                           |
| Cerquitelli et al., 2016    | collection of patient records from Hospital | EMR            | 1 year       | 2014                          | 6,38            | Italy                       | diabetes (overt diabetes)                                                      | 4                            |
| Charles-Nelson et al., 2020 | administrative claims database (PMSI)       | claims data    | 1 year       | 2013                          | 196,323         | France                      | obesity with bariatric surgery (certain surgeries named), diagnosis of obesity | 4                            |
| Chen et al., 2020           | EMR data from three chinese hospitals       | EMR            | 14 days      | not named                     | 8,151           | China                       | cerebral infarction                                                            | 9                            |
| Chen et al., 2018           | EMR data from three chinese hospitals       | EMR            | 14 days      | not named                     | 8,287           | China                       | cerebral infarction                                                            | 9                            |

Additional File 2: Data Extraction of the included studies

| Study                    | Type of data                                                                                              | Classification | Data horizon | Date of first data collection | Population size | origin of data / population | characteristic of population | corresponding ICD-10 chapter |
|--------------------------|-----------------------------------------------------------------------------------------------------------|----------------|--------------|-------------------------------|-----------------|-----------------------------|------------------------------|------------------------------|
| Cheng, Ren, 2017         | health care data ; Medicare data                                                                          | EMR            | not named    |                               | 8,287           | not named                   | pregnancy                    | 15                           |
| Cherrie et al., 2020     | National Health Service (NHS) prescription data                                                           | claims data    | 6 months     | 2009-2014                     | 151,418         | Scotland                    | mental illness               | 5                            |
| Chiudinelle et al., 2020 | Hospital Information Systems (HIS) and registry of clinical and molecular data: electronic health records | EHR            | 11 years     | 2007                          | 3,564           | Italy                       | cancer (breast cancer)       | 2                            |

Additional File 2: Data Extraction of the included studies

| Study                 | Type of data                                                              | Classification      | Data horizon | Date of first data collection | Population size | origin of data / population | characteristic of population | corresponding ICD-10 chapter |
|-----------------------|---------------------------------------------------------------------------|---------------------|--------------|-------------------------------|-----------------|-----------------------------|------------------------------|------------------------------|
| Concaro et al., 2011  | administrative database to the regional health care agency (ASL) of Pavia | administrative data | 2 years      | 2005                          | 2,513           | Italy                       | diabetes                     | 4                            |
| Dagliati et al., 2018 | administrative data from Pavia Local Health Care Agency (ATS)             | administrative data | 10 years     | after 2014                    | 424             | Italy                       | Diabetes (type 2)            | 4                            |
| Dauxais et al., 2017  | SNIIRAM - more detailed about care events                                 | SNIIRAM             | 3 years      | 2009                          | 8,379           | France                      | epilepsy                     | 6                            |
| Egho et al., 2014     | PMSI including administrative data and EMR                                | PMSI                | not named    | not named                     | 828             | France                      | cancer (lung cancer)         | 2                            |

Additional File 2: Data Extraction of the included studies

| Study                | Type of data                                                                                                     | Classification           | Data horizon | Date of first data collection | Population size | origin of data / population | characteristic of population                                                                                                                                     | corresponding ICD-10 chapter |
|----------------------|------------------------------------------------------------------------------------------------------------------|--------------------------|--------------|-------------------------------|-----------------|-----------------------------|------------------------------------------------------------------------------------------------------------------------------------------------------------------|------------------------------|
| Esmaili et al., 2021 | accident data + utilization data of psychology and physiotherapy<br><br>Australien Transport Accident Commission | else                     | 106 months   |                               | 582             | Australia                   | motor vehical accident                                                                                                                                           | 20                           |
| Estiri et al., 2020  | EHR + medication records (Mass General Brigham Biobank)                                                          | EHR + medication records | 5 years      | 2009                          | 351             | USA                         | several diseases (Alzheimer's disease, chronic obstructive pulmonary disease (COPD), congestive heart failure, coronary artery disease (CAD), stroke, rheumatoid | 18, 13, 10, 9, more          |

Additional File 2: Data Extraction of the included studies

| Study               | Type of data                                                                        | Classification        | Data horizon  | Date of first data collection | Population size | origin of data / population | characteristic of population                                                                                                                 | corresponding ICD-10 chapter |
|---------------------|-------------------------------------------------------------------------------------|-----------------------|---------------|-------------------------------|-----------------|-----------------------------|----------------------------------------------------------------------------------------------------------------------------------------------|------------------------------|
|                     |                                                                                     |                       |               |                               |                 |                             | arthritis, T1DM, T2DM, ulcerative colitis, and atrial fibrillation.)                                                                         |                              |
| Han et al., 2020    | discharge medical record database, Beijing                                          | EMR                   | 3 years       |                               | 831             | China                       | alcohol use disorder                                                                                                                         | 5                            |
| Hilton et al., 2018 | Medicaid Analytical Extract (MAX) medical claims data; individual-level claims data | (medical) claims data | several years | 2012                          | 1,500,000       | USA                         | persistent asthma (children with persistent asthma; children ages 4–18 with an asthma-related diagnosis age: 4 - 18 years; pediatric asthma) | 10                           |

Additional File 2: Data Extraction of the included studies

| Study                    | Type of data                                                                                                   | Classification            | Data horizon | Date of first data collection | Population size | origin of data / population | characteristic of population                                                     | corresponding ICD-10 chapter |
|--------------------------|----------------------------------------------------------------------------------------------------------------|---------------------------|--------------|-------------------------------|-----------------|-----------------------------|----------------------------------------------------------------------------------|------------------------------|
| Honda et al., 2017       | EMR - medical treatment data - University of Miyazaki Hospital                                                 | EMR                       | 24 years     | 1991                          | 288             | Japan                       | Resection of a Bladder tumor (TUR-Bt) und Endoscopic Submucosal Dissection (ESD) | 2                            |
| Hur et al., 2020         | Electronic health record - MIMIC-III database                                                                  | MIMIC III                 | not named    | not named                     | 11,811          | USA                         | heart disease                                                                    | 9                            |
| Kempa-Liehr et al., 2020 | electronic patient records (from Radiology Information System (RIS) and the patient administration system iPM) | EMR + administrative data | 2 years      | 2015                          | 448             | New Zealand                 | surgery                                                                          | else                         |

Additional File 2: Data Extraction of the included studies

| Study                     | Type of data                                                                                                  | Classification | Data horizon  | Date of first data collection | Population size | origin of data / population | characteristic of population                   | corresponding ICD-10 chapter |
|---------------------------|---------------------------------------------------------------------------------------------------------------|----------------|---------------|-------------------------------|-----------------|-----------------------------|------------------------------------------------|------------------------------|
| Ku et al., 2020           | National Health Insurance Research Database (comprises healthcare claims) routine data                        | claims data    | 10 years      | 2000                          | 6,258           | Taiwan                      | tuberculosis                                   | 1                            |
| Lakshmanan et al., 2013   | EMR of an US-based health care provider                                                                       | EMR            | several years | not named                     | 2,094           | USA                         | heart disease (congestive heart failure (CHF)) | 9                            |
| Lambert-Côté et al., 2020 | French national study VICAN2 (1e deux ans après un diagnostic de CANcer): 1. SNIIRAM; 2. telephone interviews | SNIIRAM        | 5 years       | 2010                          | 674             | France                      | cancer (breast cancer, hormone sensitive)      | 2                            |



Additional File 2: Data Extraction of the included studies

| Study                | Type of data                                          | Classification           | Data horizon                           | Date of first data collection | Population size | origin of data / population | characteristic of population                                                               | corresponding ICD-10 chapter |
|----------------------|-------------------------------------------------------|--------------------------|----------------------------------------|-------------------------------|-----------------|-----------------------------|--------------------------------------------------------------------------------------------|------------------------------|
| Le Meur et al., 2015 | SNIIRAM                                               | SNIIRAM                  | 9 months                               | 2008                          | 2,518           | France                      | pregnancy (who gave birth without complications)                                           | 15                           |
| Le et al., 2019      | electronic medical records                            | EMR                      | 24 years                               | 1991                          | 394             | Japan                       | Transurethral Resection of a Bladder tumor (TUR-Bt)                                        | 2                            |
| Li et al., 2019      | electronic medical records                            | EMR                      | 4 years                                | --                            | 4,977           | not named                   | heart failure                                                                              | 9                            |
| Meng et al., 2019    | IBM® MarketScan-commercial - insurance claims dataset | claims data - commercial | 1 year + remaining time; up to 8 years | 2011                          | 23,830          | USA                         | cancer (metastatic nonsmall cell lung cancer and metastatic melanoma)                      | 2                            |
| Najjar et al., 2018  | administrative data (RAMQ, MSSS)                      | administrative data      | 9 years                                | 2000                          | 180,027         | Canada                      | heart failure (heart failure in elderly people (older 65 years))                           | 9                            |
| Nuemi et al., 2013   | national PMSI databases                               | PMSI                     | 1 year                                 | 2004                          | 495             | France                      | cancer (primary lung cancer who had undergone surgery for the management of non-metastatic | 2                            |

Additional File 2: Data Extraction of the included studies

| Study                | Type of data                                                                                   | Classification | Data horizon | Date of first data collection | Population size | origin of data / population | characteristic of population | corresponding ICD-10 chapter |
|----------------------|------------------------------------------------------------------------------------------------|----------------|--------------|-------------------------------|-----------------|-----------------------------|------------------------------|------------------------------|
|                      |                                                                                                |                |              |                               |                 |                             | malignant tumours)           |                              |
| Oh et al., 2016      | electronic health record from Mayo Clinic primary care patients residing in Olmsted County, MN | EHR            | 15 years     | 1999                          | 43,509          | USA                         | diabetes                     | 4                            |
| Ou-Yang et al., 2019 | Taiwan Health insurance database; NHIRD data                                                   | claims data    | 1 year       | 2008                          | 545             | Taiwan                      | SJS                          | 12                           |

Additional File 2: Data Extraction of the included studies

| Study                 | Type of data                                                                                     | Classification | Data horizon | Date of first data collection | Population size | origin of data / population | characteristic of population        | corresponding ICD-10 chapter |
|-----------------------|--------------------------------------------------------------------------------------------------|----------------|--------------|-------------------------------|-----------------|-----------------------------|-------------------------------------|------------------------------|
| Perer et al., 2015    | EMR - source not clear - Dr Sorrentino (Chief Medical Officer of Providence Medical Foundations) | EMR            | 455 days     | not named                     | 1,386           | not named                   | diabetes + hyperlipidemia diagnosis | 4                            |
| Pokharel et al., 2020 | MIMIC III dataset, including ICU data                                                            | MIMIC III      | not named    | not named                     | 5,274           | USA                         | sequential organ failure            | 1                            |
| Rama et al., 2019     | EMR; Portuguese nationwide database developed by the Portuguese Society of Rheumatology          | EMR            | not named    | not named                     | 426             | Portugal                    | rheumatoid arthritis                | 13                           |

Additional File 2: Data Extraction of the included studies

| Study               | Type of data                                                                                                                                  | Classification      | Data horizon       | Date of first data collection | Population size | origin of data / population | characteristic of population                                             | corresponding ICD-10 chapter |
|---------------------|-----------------------------------------------------------------------------------------------------------------------------------------------|---------------------|--------------------|-------------------------------|-----------------|-----------------------------|--------------------------------------------------------------------------|------------------------------|
| Rao A. et al., 2018 | administrative data: Hospital Episode Statistics data (HES) (include information on all the inpatient hospital admissions - public hospitals) | administrative data | 5 years            | 2006                          | 16,973          | England                     | abdominal aortic aneurysm (after abdominal aortic aneurysm (AAA) repair) | 9                            |
| Rao A. et al., 2017 | national administrative data (Hospital Episode Statistics (HES))                                                                              | administrative data | at least 4 years   | 2010                          | 60,225          | England                     | Cardiovascular diseases (cerebrovascular patients)                       | 9                            |
| Rao G. et al., 2018 | EHR: Enterprise Data Warehouse (EDW),                                                                                                         | EHR                 | at least 12 months | 2011                          | 501             | USA                         | abdominal pain                                                           | 18                           |

Additional File 2: Data Extraction of the included studies

| Study                | Type of data                                                                       | Classification      | Data horizon             | Date of first data collection | Population size | origin of data / population | characteristic of population                 | corresponding ICD-10 chapter |
|----------------------|------------------------------------------------------------------------------------|---------------------|--------------------------|-------------------------------|-----------------|-----------------------------|----------------------------------------------|------------------------------|
| Righolt et al., 2020 | Manitoba Health maintains several centralized, administrative electronic databases | administrative data | follow up 1,2,5,10 years | 1995                          | 27,786          | Canada                      | Diabetes (type 2, usind metformin)           | 4                            |
| Roux et al., 2018    | PMSI                                                                               | PMSI                | 7 years                  | 2007                          | 1,000           | France                      | multiple sclerosis                           | 6                            |
| Solomon et al., 2020 | Corrona, a large real-world Rheumatoid Arthritis registry                          | EMR                 | 5 years                  | 2002                          | 7,300           | USA                         | rheumatoid arthritis                         | 13                           |
| Sun et al., 2013     | outpatient encounter data                                                          | Not clear           | 1 year                   | 2011                          | 11,946          | China                       | Diabetes (type 2)                            | 4                            |
| Vanasse et al., 2020 | health insurance board                                                             | Not clear           | 1 year                   | 2013                          | 2,581           | Canada                      | COPD (Chronic Obstructive Pulmonary Disease) | 10                           |

Additional File 2: Data Extraction of the included studies

| Study                                                    | Type of data                                                          | Classification | Data horizon | Date of first data collection | Population size | origin of data / population | characteristic of population  | corresponding ICD-10 chapter |
|----------------------------------------------------------|-----------------------------------------------------------------------|----------------|--------------|-------------------------------|-----------------|-----------------------------|-------------------------------|------------------------------|
| Vogt et al., 2017                                        | routine data; ambulatory sector                                       | claims data    | 2 years      | 2009                          | 982             | Germany                     | heart disease (heart failure) | 9                            |
| Wang et al., 2013                                        | EHR specification of source                                           | EHR            | 1 year       | not named                     | 21,384          | USA                         | diabetes                      | 4                            |
| Wright et al., 2005                                      | claims data                                                           | claims data    | 3 years      | 2008                          | 161,497         | USA                         | diabetes                      | 4                            |
| Yan et al., 2016                                         | Data from EMR system                                                  | EMR            | 4 months     | 2010                          | 785             | USA                         | heart disease (heart failure) | 9                            |
| Zhang and Padman, 2015                                   | EHR data from a community nephrology practice in western Pennsylvania | EHR            | 4 years      | 2009                          | 664             | not named                   | CKD (chronic kidney disease)  | 14                           |
| Zhang, Padman, Wasserman, Patel, Teredesai and Xie, 2015 | EHR                                                                   | EHR            | not named    | 2009                          | 1,624           | USA                         | CKD (chronic kidney disease)  | 14                           |

Additional File 2: Data Extraction of the included studies

| Study                         | Type of data                                                            | Classification | Data horizon | Date of first data collection | Population size | origin of data / population | characteristic of population | corresponding ICD-10 chapter |
|-------------------------------|-------------------------------------------------------------------------|----------------|--------------|-------------------------------|-----------------|-----------------------------|------------------------------|------------------------------|
| Zhang, Padman and Patel, 2015 | EHR - visit data                                                        | EHR            | 54 months    | 2009                          | 1,576           | USA                         | CKD (chronic kidney disease) | 14                           |
| Zhang et al., 2014            | EHR: office visit data from nephrology practice in Western Pennsylvania | EHR            | 4 years      | 2009                          | 2,511           | USA                         | CKD (chronic kidney disease) | 14                           |

Table 2: Extracted Information on used events for constructing the sequences in the included studies

| Study                | Care events              | Prescriptions | Medication | Medication use | Procedures | visits | attended specialist | Hospitalization | Diagnosis | vital signs | health outcome | else |
|----------------------|--------------------------|---------------|------------|----------------|------------|--------|---------------------|-----------------|-----------|-------------|----------------|------|
| Alharbi et al., 2018 | extraction of event logs |               |            |                |            |        |                     |                 |           |             |                | x    |
| Baker et al., 2017   | diagnosis                |               |            |                |            |        |                     |                 | x         |             |                |      |

Additional File 2: Data Extraction of the included studies

| Study                       | Care events                                    | Prescriptions | Medication | Medication use | Procedures | visits | attended specialist | Hospitalization | Diagnosis | vital signs | health outcome | else |
|-----------------------------|------------------------------------------------|---------------|------------|----------------|------------|--------|---------------------|-----------------|-----------|-------------|----------------|------|
| Boborske et al., 2020       | prescriptions, lab tests, visits               | x             |            |                | x          | x      |                     |                 |           |             |                |      |
| Cerquitelli et al., 2016    | prescriptions, examinations                    | x             |            |                | x          |        |                     |                 |           |             |                |      |
| Charles-Nelson et al., 2020 | diagnosis, procedures (therapeutical, medical) |               |            |                | x          |        |                     |                 | x         |             |                |      |
| Chen et al., 2020           | treatments, doctor order, lab results          | x             |            |                | x          |        |                     |                 |           | x           |                |      |
| Chen et al., 2018           | medication prescriptions, health outcome       | x             | x          |                |            |        |                     |                 |           |             | x              |      |
| Cheng and Ren., 2017        | medication, type of treating staff             |               | x          |                |            |        | x                   |                 |           |             |                |      |
| Cherrie et al., 2020        | prescription data                              | x             |            |                |            |        |                     |                 |           |             |                |      |
| Chiudinelle et al., 2020    | therapy, type of surgery, cancer specific data | x             |            |                | x          |        |                     |                 |           |             |                |      |
| Concaro et al., 2011        | DRG, diagnosis and procedures in hospital,     |               | x          |                | x          |        |                     |                 | x         |             |                | x    |



Additional File 2: Data Extraction of the included studies

| Study                 | Care events                                                                                  | Prescriptions | Medication | Medication use | Procedures | visits | attended specialist | Hospitalization | Diagnosis | vital signs | health outcome | else |
|-----------------------|----------------------------------------------------------------------------------------------|---------------|------------|----------------|------------|--------|---------------------|-----------------|-----------|-------------|----------------|------|
|                       | ambulatory, drugs                                                                            |               |            |                |            |        |                     |                 |           |             |                |      |
| Dagliati et al., 2018 | drug purchases, procedures (ambulatory), hospitalizations, SPU visits (short procedure unit) |               |            | x              | x          |        |                     | x               |           |             |                |      |
| Dauxais et al., 2017  | drugs, hospitalisations                                                                      |               | x          |                |            |        |                     | x               |           |             |                |      |
| Egho et al., 2014     | procedures, diagnosis (in hospital)                                                          |               |            |                | x          |        |                     |                 | x         |             |                |      |
| Esmaili et al., 2021  | treatments (psychology and physiotherapy)                                                    |               |            |                | x          |        |                     |                 |           |             |                |      |
| Estiri et al., 2020   | diagnosis, medication,                                                                       |               | x          |                |            |        |                     |                 | x         |             |                |      |
| Han et al., 2020      | medical records                                                                              |               |            |                |            |        |                     |                 |           |             |                | x    |
| Hilton et al., 2018   | (selected) medication, (hospital, physician) visits                                          |               | x          |                |            | x      |                     |                 |           |             |                |      |

Additional File 2: Data Extraction of the included studies

| Study                     | Care events                                                    | Prescriptions | Medication | Medication use | Procedures | visits | attended specialist | Hospitalization | Diagnosis | vital signs | health outcome | else |
|---------------------------|----------------------------------------------------------------|---------------|------------|----------------|------------|--------|---------------------|-----------------|-----------|-------------|----------------|------|
| Honda et al., 2017        | treatments, diagnosis, medication                              |               | x          |                | x          |        |                     |                 | x         |             |                |      |
| Hur et al., 2020          | diagnosis, comorbidities, lab tests, prescriptions, procedures | x             |            |                | x          |        |                     |                 | x         |             |                |      |
| Kempa-Liehr et al., 2020  | patient records (hospital)                                     |               |            |                |            |        |                     |                 |           |             |                | x    |
| Ku et al., 2020           | treatments, visits, healthcare records                         |               |            |                | x          | x      |                     |                 |           |             |                | x    |
| Lakshmanan et al., 2013   | diagnosis, medication, lab tests, vital signs                  |               | x          |                | x          |        |                     |                 | x         | x           |                |      |
| Lambert-Côté et al., 2020 | medication use, comorbidity                                    |               |            | x              |            |        |                     |                 |           |             |                |      |
| Le Meur et al., 2015      | visits                                                         |               |            |                |            | x      |                     |                 |           |             |                |      |
| Le et al., 2019           | treatments, prescriptions                                      | x             |            |                | x          |        |                     |                 |           |             |                |      |
| Li et al., 2019           | diagnosis, medication,                                         |               | x          |                | x          |        |                     |                 | x         |             |                |      |

Additional File 2: Data Extraction of the included studies

| Study                | Care events                                               | Prescriptions | Medication | Medication use | Procedures | visits | attended specialist | Hospitalization | Diagnosis | vital signs | health outcome | else |
|----------------------|-----------------------------------------------------------|---------------|------------|----------------|------------|--------|---------------------|-----------------|-----------|-------------|----------------|------|
|                      | procedures, lab tests                                     |               |            |                |            |        |                     |                 |           |             |                |      |
| Meng et al., 2019    | medications and specific procedures                       |               | x          |                | x          |        |                     |                 |           |             |                |      |
| Najjar et al., 2018  | (medical + hospital) visits, consultations                |               |            |                |            | x      |                     |                 |           |             |                |      |
| Nuemi et al., 2013   | hospital visits, procedures, specific disease information |               |            |                | x          | x      |                     |                 |           | x           |                |      |
| Oh et al., 2016      | diagnosis, lab measurements, vitals                       |               |            |                |            |        |                     |                 | x         | x           |                |      |
| Ou-Yang et al., 2019 | (inpatient, ambulant) visits, prescriptions, diagnosis,   | x             |            |                |            | x      |                     |                 | x         |             |                |      |
| Perer et al., 2015   | medication, diagnosis, labs, vital signs                  |               | x          |                | x          |        |                     |                 | x         | x           |                |      |



Additional File 2: Data Extraction of the included studies

| Study                  | Care events                                                        | Prescriptions | Medication | Medication use | Procedures | visits | attended specialist | Hospitalization | Diagnosis | vital signs | health outcome | else |
|------------------------|--------------------------------------------------------------------|---------------|------------|----------------|------------|--------|---------------------|-----------------|-----------|-------------|----------------|------|
| Sun et al., 2013       | diagnosis, medication, lab tests (+ imaging reports)               |               | x          |                | x          |        |                     |                 | x         |             |                |      |
| Vanasse et al., 2020   | type of treating institution, type of care provider, consultation, |               |            |                |            | x      | x                   |                 |           |             |                |      |
| Vogt et al., 2017      | prescriptions, examinations, type of physician                     | x             |            |                | x          |        | x                   |                 |           |             |                |      |
| Wang et al., 2013      | procedures, lab results, physician visits (primary)                |               |            |                | x          | x      |                     |                 |           | x           |                |      |
| Wright et al., 2005    | drug class                                                         |               | x          |                |            |        |                     |                 |           |             |                |      |
| Yan et al., 2016       | diagnosis, procedures, visits                                      |               |            |                | x          | x      |                     |                 | x         |             |                |      |
| Zhang and Padman, 2015 | medications, diagnosis, biochemical measurements                   |               | x          |                |            |        |                     |                 | x         | x           |                |      |
| Zhang, Padman,         | procedures, diagnosis,                                             |               | x          |                | x          | x      |                     |                 | x         |             |                |      |

Additional File 2: Data Extraction of the included studies

| Study                                     | Care events                                        | Prescriptions | Medication | Medication use | Procedures | visits | attended specialist | Hospitalization | Diagnosis | vital signs | health outcome | else |
|-------------------------------------------|----------------------------------------------------|---------------|------------|----------------|------------|--------|---------------------|-----------------|-----------|-------------|----------------|------|
| Wasserman, Patel, Teredesai and Xie, 2015 | medication, visit purpose                          |               |            |                |            |        |                     |                 |           |             |                |      |
| Zhang, Padman and Patel, 2015             | procedures, medications, diagnosis, visits purpose |               | x          |                | x          | x      |                     |                 | x         |             |                |      |
| Zhang et al., 2014                        | procedures, diagnosis, visits in hospital          |               |            |                | x          | x      |                     |                 | x         |             |                |      |

For presentation in Scoping Review the data was combined according to the following list:

Table 3: Aggregated information on the considered events.

| Types of events for analysis |                                                              | N (%)     |
|------------------------------|--------------------------------------------------------------|-----------|
|                              | prescriptions                                                | 11 (22 %) |
|                              | medications, medication use                                  | 21 (41%)  |
|                              | procedures                                                   | 28 (55%)  |
|                              | visits, hospitalization, attended specialist                 | 23 (45%)  |
|                              | diagnosis                                                    | 21 (41%)  |
|                              | individual health data: health outcome, results of lab/tests | 9 (18%)   |

Additional File 2: Data Extraction of the included studies

|                                                                        |         |
|------------------------------------------------------------------------|---------|
| Else: not specified (medical records, patient records) / others (DRGs) | 5 (10%) |
|------------------------------------------------------------------------|---------|

Table 4: Extracted data from the included studies. Information on applied methods and stated aim. Classifications of methods (MM: Markov Model, PM: Pattern Mining, Clust: Clustering) and Stated Aims (Proposal, Trajectory, Pattern, Prediction) given in the Scoping Review are added for clarity.

| Study                 | Applied method                                                                                                                                                                                                        | Method - class | Prediction | Stated aim                                                                                                       | Aim - class          | Presentation of results                                              | Program use             |
|-----------------------|-----------------------------------------------------------------------------------------------------------------------------------------------------------------------------------------------------------------------|----------------|------------|------------------------------------------------------------------------------------------------------------------|----------------------|----------------------------------------------------------------------|-------------------------|
| Alharbi et al., 2018  | Hidden Markov Model; parameter estimation with seqHMMR in R, chose best model on BIC; Viterbi-Algorithm to extract most probable sequences; use BIC to find best final log likelihood, fitting training and test data | MM             |            | Exploration of hidden sub-processes                                                                              | Pattern              | pattern as weighted graph, flowchart                                 | R, DISCO process mining |
| Baker et al., 2017    | simplify pathways on experts opinions; Markov Model for transition                                                                                                                                                    | MM             | no         | Establishing of a reproducible process-mining methods; Define and quantify patient pathways during the treatment | Proposal, Trajectory | table including trajectories with weight; first steps of utilization | SQL                     |
| Boborske et al., 2020 | ensemble clustering using different partitioning cluster algorithms (eg. K-means, kmeans++), Levenshtein edit distance for similarity; use kmeans++ to choose cluster centers.                                        | Clust.         | no         | Development of method to extract patient care trajectory                                                         | Proposal, Trajectory | vizualized as sankey diagram                                         | not named               |

Additional File 2: Data Extraction of the included studies

| Study                       | Applied method                                                                                                                                                                                                                                                                                                                 | Method - class | Prediction                                                   | Stated aim                                                                                                               | Aim - class             | Presentation of results                         | Program use                 |
|-----------------------------|--------------------------------------------------------------------------------------------------------------------------------------------------------------------------------------------------------------------------------------------------------------------------------------------------------------------------------|----------------|--------------------------------------------------------------|--------------------------------------------------------------------------------------------------------------------------|-------------------------|-------------------------------------------------|-----------------------------|
| Cerquitelli et al., 2016    | Multi-Level-Clustering. similarity: Cosine distance measure for similarity. Clustering: Bisecting K-medoids, bisecting kmeans, refined kmeans and refined kmedoids; Multiple Level DBSCAN. Evaluation: Sum of squared error, Silhouette, overall similarity, Rand Index; MLC framework in Java, max. sequential pattern mining | Clust.         |                                                              | Proposal of two-phase data mining method.<br><br>Iteratively identification of groups of objects with common properties. | Proposal, Phenotyping   | table including pattern with weights (support)  | Java, RapidMiner            |
| Charles-Nelson et al., 2020 | Formal Concept Analysis includes a clustering of objects                                                                                                                                                                                                                                                                       | Clust.         | no                                                           | Define trajectory of care; Quantification of complications in treatment                                                  | Trajectory              | directed graph, trajectory, weighted            | Coron System, R             |
| Chen et al., 2020           | constructuin of DOSS; multiview Network Fusion; Markov Model; consideration of duration; clustering (spectral, k-means, laplacian)                                                                                                                                                                                             | MM             | no                                                           | Discovery of treatment patterns to find right treatment                                                                  | Proposal, Pattern       | pattern as weighted graph, sequence on timeline | Matlab, R                   |
| Chen et al., 2018           | construction of DOSS; Markov Models; clustering on DOS                                                                                                                                                                                                                                                                         | MM             | using treatment efficacy (outcome, economic, length of stay) | Extraction of treatment processes; For clinicians to make better decisions                                               | Trajectory              | trajectory with weights, directed               | Matlab, R + Microsoft Visio |
| Cheng and Ren, 2017         | Pattern Mining using Sequential Pattern Mining with bitmap representation (SPAM)                                                                                                                                                                                                                                               | PM             | no                                                           | Discovery of patients medical behavior                                                                                   | Pattern                 | table including pattern                         | not named                   |
| Cherrie et al., 2020        | clustering on pattern; similarity: Optimal Matching for sequences; clustering: hierarchical using Wards method; Use of TraMineR in R                                                                                                                                                                                           | Clust.         | determine the association between each antidepressant        | Classification of individual treatment trajectories;                                                                     | Trajectory, Phenotyping | trajectory on timeline                          | R, lme4                     |



Additional File 2: Data Extraction of the included studies

| Study                    | Applied method                                                                                       | Method - class | Prediction                                                                                                                      | Stated aim                                                                                                                                          | Aim - class                   | Presentation of results                            | Program use       |
|--------------------------|------------------------------------------------------------------------------------------------------|----------------|---------------------------------------------------------------------------------------------------------------------------------|-----------------------------------------------------------------------------------------------------------------------------------------------------|-------------------------------|----------------------------------------------------|-------------------|
|                          |                                                                                                      |                | trajectory (i.e. dependent variables) and each of the auxiliary measures of mental illness using multilevel logistic regression | Identification of groups of individuals with similar patterns of treatment; Characterizing population most at risk of increasing mental ill health. |                               |                                                    |                   |
| Chiudinelli et al., 2020 | Topic Modelling to reduce complexity; careflow Mining (SPM); grouping by experts                     | PM             | survival probability : Kaplan-Meier methods                                                                                     | Identify frequent patterns of care; Discovery temporal phenotypes.                                                                                  | Pattern, Phenotyping          | trajectory as graph                                | R, Pentaho Kettle |
| Concaro et al., 2011     | Association Rule Mining                                                                              | Other          |                                                                                                                                 | Proposal of method to extract temporal association rules on sequences using hybrid events                                                           | Proposal, Pattern             | table with patterns and weights                    | not named         |
| Dagliati et al., 2018    | Pattern Mining using Careflow Mining based on Frequent Pattern Mining; clustering of careflows       | PM             |                                                                                                                                 | Identify frequent patterns of care                                                                                                                  | Pattern                       | trajectory as graph, directed                      | not named         |
| Dauxais et al., 2017     | Temporal Pattern Mining using discriminant chronicles (DCM); frequent itemset mining and rule Mining | PM             | Identification of possible associations between hospitalizations for seizure and anti-epileptic drug switches                   | Proposal of new discriminant pattern mining algorithm; Discovering of discriminant chronicle patterns.                                              | Proposal, Pattern, Prediction | patterns as graph, weighted; trajectories in table | not named         |

Additional File 2: Data Extraction of the included studies

| Study                | Applied method                                                                                                                                    | Method - class | Prediction                                                                                                                                                | Stated aim                                                                                                    | Aim - class           | Presentation of results          | Program use |
|----------------------|---------------------------------------------------------------------------------------------------------------------------------------------------|----------------|-----------------------------------------------------------------------------------------------------------------------------------------------------------|---------------------------------------------------------------------------------------------------------------|-----------------------|----------------------------------|-------------|
|                      |                                                                                                                                                   |                | in care pathway of epileptic patients. The DCM algorithm is used to extract patterns of drugs deliveries that discriminate occurrences of recent seizure. |                                                                                                               |                       |                                  |             |
| Egho et al., 2014    | Pattern Mining - Mining Multidimensional Itemset Sequential Pattern                                                                               | PM             | nn                                                                                                                                                        | Identification of pattern from patient trajectories                                                           | Pattern               | pattern with weights in table    | Java        |
| Esmaili et al., 2021 | Markov Models for time series clustering; improve clustering using ML                                                                             | MM             | no                                                                                                                                                        | Identification of utilization patterns; Classification of patient groups associated with utilization patterns | Pattern, Phenotyping  | trajectory with weights as graph | R, Python   |
| Estiri et al., 2020  | transitive Sequential Pattern Mining with minimize sparsity and maximize relevance algorithm (MSMR) to reduce complexity. R code online in github | PM             | Yes. Disease prediction and classification; Bootstrap CV and log Regression                                                                               | Proposal of phenotyping method; Analysis of temporal Representation mined through SPM improves phenotyping    | Proposal, Phenotyping | patterns as graph, descriptive   | R           |
| Han et al., 2020     | construction of pathways; discrete sequential-state analysis; clustering of trajectories. Similarity: Optimal Matching. Clustering: hierachical,  | Clust.         | Kruskal–Wallis tests and Mann–Whitney                                                                                                                     | Discovering of temporal hospitalization patterns                                                              | Trajectory            | trajectory as graph              | R           |

Additional File 2: Data Extraction of the included studies

| Study | Applied method                                            | Method - class | Prediction                                                                                                                                                                                                                                                                                                                                                                | Stated aim | Aim - class | Presentation of results | Program use |
|-------|-----------------------------------------------------------|----------------|---------------------------------------------------------------------------------------------------------------------------------------------------------------------------------------------------------------------------------------------------------------------------------------------------------------------------------------------------------------------------|------------|-------------|-------------------------|-------------|
|       | Wards method. State Sequence Analysis with TraMineR in R. |                | U tests were used on continuous variables, and Chi-square tests were applied to the group comparisons among categorical variables. Pairwise comparisons were performed if applicable, with the Bonferroni correction. Our findings show the associations between the hospitalization patterns and healthcare service utilization, outcome quality and provider variations |            |             |                         |             |

Additional File 2: Data Extraction of the included studies

| Study               | Applied method                                                                                                                                                               | Method - class | Prediction                                                                                                                                                                                                                | Stated aim                                                                                                                                   | Aim - class                      | Presentation of results                                       | Program use                  |
|---------------------|------------------------------------------------------------------------------------------------------------------------------------------------------------------------------|----------------|---------------------------------------------------------------------------------------------------------------------------------------------------------------------------------------------------------------------------|----------------------------------------------------------------------------------------------------------------------------------------------|----------------------------------|---------------------------------------------------------------|------------------------------|
| Hilton et al., 2018 | Markov Models for transition; clustering of resulted sequences                                                                                                               | MM             |                                                                                                                                                                                                                           | Proposal of framework for analyzing and vizualizing utilization                                                                              | Proposal, Trajectory             | trajectory with weights as graph                              | not named                    |
| Honda et al., 2017  | Pattern Mining unsing T-PrefixSpan including the consideration of time intervalls between treatments; grouping of pathways on number of tratments per relative treatment day | PM             | no                                                                                                                                                                                                                        | Proposal of method to detect variants in frequent patterns; Discovery of variants of frequent patterns of care; considering time information | Proposal, Pattern                | trajectory as graph; patterns in table with weights           | tool D3.js                   |
| Hur et al., 2020    | Sequential Pattern Mining using CloFast to select groups of Patients                                                                                                         | PM             | LSTM attention model, a deep learning method, learning long-term dependencies; CloFAST interpretable for prediction of diagnosis of heart failure and probability of unplanned cardiac surgery; applying Cross validation | Proposal of method to increase efficiency iteratively data methods entailing sequence mining; Prediction model of unplanned surgeries        | Proposal, Trajectory, Prediction | trajectories as graph - sankey; pattern in table with weights | SQL, Python, Keras + ReactJS |

Additional File 2: Data Extraction of the included studies

| Study                    | Applied method                                                                                                                                                                                                                  | Method - class | Prediction                                                                                                                                       | Stated aim                                                                                                              | Aim - class                      | Presentation of results                             | Program use                                              |
|--------------------------|---------------------------------------------------------------------------------------------------------------------------------------------------------------------------------------------------------------------------------|----------------|--------------------------------------------------------------------------------------------------------------------------------------------------|-------------------------------------------------------------------------------------------------------------------------|----------------------------------|-----------------------------------------------------|----------------------------------------------------------|
| Kempa-Liehr et al., 2020 | grouping of events to reduce complexity; Use ProM to discover and review healthcare pathways                                                                                                                                    | Other          | Machine learning methodologies based on probabilistic programming are utilized to explore pathway features that influence patient recovery time. | Identification of trajectories; Discovery of pathway features influencing the patients recovery time (prediction model) | Trajectory, Prediction           | trajectory with weights as graph                    | ProM                                                     |
| Ku et al., 2020          | Patient Pathway Analysis in Python; additional statistics; pathways of states;                                                                                                                                                  | Other          |                                                                                                                                                  | Discovery of temporal frequent patterns; Analysis of complexity, heterogeneity of patient pathway                       | Proposal, Trajectory,            | trajectory as graph - sankey, on timeline           | Python, R                                                |
| Lakshmanan et al., 2013  | clustering to remove outliers (not obligatory); Pattern Mining using Sequential Pattern Mining with bitmap representation (SPAM); identification of patterns with high correlation with patients outcome using Information Gain | PM             | relation between pattern and patient outcome (information Gain); users can overlay frequent patterns, ranked according to their correlation      | Proposal of method to mine clinical care pathways correlated with health outcome                                        | Proposal, Trajectory, Prediction | trajectory as graph; patterns in table with weights | BIP - business process insight, Java, google Web Toolkit |

Additional File 2: Data Extraction of the included studies

| Study                     | Applied method                                                                                                                                             | Method - class | Prediction                                                                                      | Stated aim                                                                                  | Aim - class            | Presentation of results          | Program use |
|---------------------------|------------------------------------------------------------------------------------------------------------------------------------------------------------|----------------|-------------------------------------------------------------------------------------------------|---------------------------------------------------------------------------------------------|------------------------|----------------------------------|-------------|
|                           |                                                                                                                                                            |                | with a particular patient outcome, on a mined model of the patient population with that outcome |                                                                                             |                        |                                  |             |
| Lambert-Côté et al., 2020 | Group based trajectory clustering; using statistical method                                                                                                | Clust.         | Multinomial logistic regressions were used to identify factors associated with trajectories.    | Identification of adherence trajectory groups; Explore factors associated with trajectories | Trajectory, Prediction | trajectory as graph, on timeline | STATA       |
| Le Meur et al., 2015      | Clustering. Similarity: Optimal Matching. Clustering: hierarchical with Wards linkage. State Sequence Analysis using TraMineR in R. Additional statistics. | Clust.         |                                                                                                 | Identifying disparities in care trajectories                                                | Trajectory             | trajectory as graph, on timeline | R           |
| Le et al., 2019           | Sequential Pattern Mining, including Variants, based on T-PrefixSpan; additional statistics                                                                | PM             | no                                                                                              | Proposal of method to evaluate variants of Sequential Pattern; Consideration of safety and  | Proposal, Pattern      | pattern as graph                 | not named   |

Additional File 2: Data Extraction of the included studies

| Study               | Applied method                                                                                                                                                                                                                                                                                                                                                                                      | Method - class | Prediction                                                                        | Stated aim                                                                                                                                                                                    | Aim - class                                | Presentation of results          | Program use            |
|---------------------|-----------------------------------------------------------------------------------------------------------------------------------------------------------------------------------------------------------------------------------------------------------------------------------------------------------------------------------------------------------------------------------------------------|----------------|-----------------------------------------------------------------------------------|-----------------------------------------------------------------------------------------------------------------------------------------------------------------------------------------------|--------------------------------------------|----------------------------------|------------------------|
|                     |                                                                                                                                                                                                                                                                                                                                                                                                     |                |                                                                                   | efficiency of sequences                                                                                                                                                                       |                                            |                                  |                        |
| Li et al., 2019     | reduce complexity; Sequential Pattern Mining with bitmap representation + temporal aspect                                                                                                                                                                                                                                                                                                           | PM             | Yes. Bag of Pattern construction for prediction                                   | Proposal of method to mine patterns from sequence of point events; Evaluation of effectiveness and discriminative power                                                                       | Proposal, Pattern                          | pattern in table with weights    | Python                 |
| Meng et al., 2019   | Construction of Line of Therapy; Clustering. Similarity: Eukclidean distance of features. Clustering: partitioning, kmeans.                                                                                                                                                                                                                                                                         | Clust.         | Chi-square for relationships between clusters (membership) and treatment sequence | Proposal of method to derive patient level care trajectory; Derive temporal phenotypes of trajectories                                                                                        | Proposal, Trajectory, Pattern, Phenotyping | trajectory as graph - sankey     | R                      |
| Najjar et al., 2018 | grouping of complex objects to reduce complexity; Hierarchical clustering of hospital stays. Hidden Markov Model-Clustering, hierarchical and partitioning; Similarity: -; Clustering: k-prototype algorithm (hier.) for clustering of centers and hierarchical clustering with average linkage for final clustering.; Training of HMM in each cluster to obtain Model Parameters (Baum-Welch-Alg.) | Clust.         |                                                                                   | Proposal method to construct care pathway from administrative data; Construct clusters of pathways to analyze and describe them; Extraction of latent patterns from patient care trajectories | Proposal, Trajectory, enable predictions   | trajectory as graph - weighted   | GHMM library, Scipy    |
| Nuemi et al., 2013  | construction of pathways; clustering of pathways: Partitioning methods (kmeans) and improbe                                                                                                                                                                                                                                                                                                         | Clust.         |                                                                                   | Proposal of method to                                                                                                                                                                         | Proposal, Trajectory, Phenotyping          | trajectory in table with weights | SAS, ClustSYR software |

Additional File 2: Data Extraction of the included studies

| Study                | Applied method                                                                                                    | Method - class | Prediction                                                                                                                                                                                                                                                                   | Stated aim                                                                                           | Aim - class                      | Presentation of results          | Program use                                 |
|----------------------|-------------------------------------------------------------------------------------------------------------------|----------------|------------------------------------------------------------------------------------------------------------------------------------------------------------------------------------------------------------------------------------------------------------------------------|------------------------------------------------------------------------------------------------------|----------------------------------|----------------------------------|---------------------------------------------|
|                      | bayrcentres. Use of CluStsyr module of SYP software.                                                              |                |                                                                                                                                                                                                                                                                              | construct pathway profiles                                                                           |                                  |                                  | (SYROKKO) + Adobe Illustrator CS 3; MapInfo |
| Oh et al., 2016      | phenotyping patients on characteristics; conditional probabilities for comorbidities; further statistics attached | Other          | To address the association between the different trajectories and the risk of developing diabetes, we constructed a multivariate logistic regression model for diabetes outcome using demographics [...], glucose level, staged comorbidities [...], and three trajectories. | Proposal of novel method to observe trajectories                                                     | Proposal, Trajectory, Prediction | trajectory in table with weights | R                                           |
| Ou-Yang et al., 2019 | grouping on fixed criterion; Generalized Sequential Pattern algorithm (GSP)                                       | PM             | association: disease pattern and medication prescribed with statistical analysis                                                                                                                                                                                             | Identification of sequential pattern of diseases, medication; diseases before Steven Johnson Syndrom | Pattern                          | pattern in table with weights    | open-source data mining library             |



Additional File 2: Data Extraction of the included studies

| Study                 | Applied method                                                                                                                                                                  | Method - class | Prediction                                      | Stated aim                                                                                                                              | Aim - class         | Presentation of results                            | Program use                                       |
|-----------------------|---------------------------------------------------------------------------------------------------------------------------------------------------------------------------------|----------------|-------------------------------------------------|-----------------------------------------------------------------------------------------------------------------------------------------|---------------------|----------------------------------------------------|---------------------------------------------------|
| Perer et al., 2015    | Sequential Pattern Mining with bitmap representation (SPAM); hierarchical clustering for vizualization; Use of Care Pathway Explorer                                            | PM             | relation between sequences and patient outcomes | Proposal of method by IBM; Identification of common sequences of care events                                                            | Proposal, Pattern   | pattern as graph - sankey; pattern in table        | python, DB2, Universal Feature Model (UFM) +D3.js |
| Pokharel et al., 2020 | Sequential Pattern Mining with gap constrained in combination with Temporal Tree Technique. (Tree: on each level a sequence, following the branch events getting more detailed) | PM             | Yes. KNN                                        | Discovery of more complex frequent patterns                                                                                             | Pattern             | trajectory in table; pattern in table with support | not named                                         |
| Rama et al., 2019     | Construction of discrete sequences. Hierarchical Clustering. Similarity: Needleman-Wunsch Algorithm. Clustering: Wards method; Bootstrapping for validation of clusters.        | Clust.         |                                                 | Identify clusters of patients by analyzing longitudinal clinical data                                                                   | Phenotyping         | pattern as graph with weights                      | AliClu                                            |
| Rao A. et al., 2018   | grouping of events; Application of Sequence Analysis in R (TraMineR)                                                                                                            | Other          |                                                 | Extraction of common sequences after surgery; Discovery of causes for readmission; Reduction of long-term readmission rate; readmission | Pattern, Prediction | pattern in table with weights                      | R                                                 |
| Rao A. et al., 2017   | grouping of events; Application of Sequence Analysis in R (TraMineR)                                                                                                            | Other          |                                                 | Identification of distinct sequences of emergeny readmission;                                                                           | Pattern             | pattern in table with weights                      | SAS, R                                            |

Additional File 2: Data Extraction of the included studies

| Study                | Applied method                                                                                                      | Method - class | Prediction                                                                                                                                                 | Stated aim                                                                                                  | Aim - class                         | Presentation of results          | Program use |
|----------------------|---------------------------------------------------------------------------------------------------------------------|----------------|------------------------------------------------------------------------------------------------------------------------------------------------------------|-------------------------------------------------------------------------------------------------------------|-------------------------------------|----------------------------------|-------------|
|                      |                                                                                                                     |                |                                                                                                                                                            | emergency readmission                                                                                       |                                     |                                  |             |
| Rao G. et al., 2018  | transform data in pathform data; transition probabilities to extract common patterns - conditional probability      | Other          |                                                                                                                                                            | Extraction of diagnostic paths                                                                              | Trajectory                          | trajectory as graph - weighted   | SAS         |
| Righolt et al., 2020 | Clustering of Patients. Similarity: (not specified); Clustering: kmeans (partitioning).                             | Clust.         | no                                                                                                                                                         | Proposal of method to characterize longitudinal data                                                        | Proposal, (Trajectory), Phenotyping | trajectory as graph, on timeline | not named   |
| Roux et al., 2018    | State Sequence Analysis in R using TraMineR. Similarity: Optimal Matching. Clustering: Wards method (hierarchical). | Clust.         |                                                                                                                                                            | Proposal of a reference process regarding toe use of state sequence analysis; Analysis of care trajectories | Proposal, Trajectory                | trajectory as graph, on timeline | R           |
| Solomon et al., 2020 | Markov Models for transition; prediction: log. Regression                                                           | MM             | A supervised machine learning algorithm was then employed to determine longitudinal patient factors associated with TCZm use. Logistic regression model to | Identification of patient drugs pathways; Association of patient factors with medication use (TCZm)         | Trajectory, Prediction              | trajectory as graph, on timeline | SAS         |

Additional File 2: Data Extraction of the included studies

| Study                | Applied method                                                                                                                                                                                                       | Method - class | Prediction                                                                                                   | Stated aim                                                                                                                                              | Aim - class            | Presentation of results         | Program use |
|----------------------|----------------------------------------------------------------------------------------------------------------------------------------------------------------------------------------------------------------------|----------------|--------------------------------------------------------------------------------------------------------------|---------------------------------------------------------------------------------------------------------------------------------------------------------|------------------------|---------------------------------|-------------|
|                      |                                                                                                                                                                                                                      |                | improve prediction (discriminate between patients on same treatment who move to different next stages/drugs) |                                                                                                                                                         |                        |                                 |             |
| Sun et al., 2013     | grouping of patients on characteristics; Sequential Pattern Mining                                                                                                                                                   | PM             |                                                                                                              | Proposal of method to mine temporal dependency in outpatient encounter                                                                                  | Proposal, Pattern      | pattern in table                | not named   |
| Vanasse et al., 2020 | Multidimensional State Sequence analysis in R using TraMineR. Similarity: Optimal Matching. Clustering: Wards linkage criterion (hierarchical).                                                                      | Clust.         |                                                                                                              | Exploration of patterns care trajectories                                                                                                               | Trajectory             | trajectory as graph on timeline | not named   |
| Vogt et al., 2017    | Categorization of events, types of service and procedure; Clustering of patient sequences: Similarity: LCS, Clustering: Kmedoids (partitioning). State Sequence Analysis in R using TraMineR. Additional statistics. | Clust.         | We used logistic regression to identify the most effective sequences for avoiding hospitalizations.          | Exploration of method to identify typical care sequences; Comparison of effectiveness of care sequences                                                 | Trajectory, Prediction | trajectory as graph on timeline | R, STATA    |
| Wang et al., 2013    | classification with nearest neighbors; temporal event signature mining using Stochastic Learning Scheme. Efficient online optimization schneeme to make                                                              | Other          | no                                                                                                           | Proposal of novel representation, learning framework to find temporal signatures in longitudinal events; Extraction of event structure and relationship |                        | pattern as graph                | not named   |

Additional File 2: Data Extraction of the included studies

| Study                                                    | Applied method                                                                                                                                            | Method - class | Prediction                                                                                                                 | Stated aim                                                                                                                   | Aim - class          | Presentation of results        | Program use                      |
|----------------------------------------------------------|-----------------------------------------------------------------------------------------------------------------------------------------------------------|----------------|----------------------------------------------------------------------------------------------------------------------------|------------------------------------------------------------------------------------------------------------------------------|----------------------|--------------------------------|----------------------------------|
|                                                          | problem more scaleable; cNMF, sparsity regularization, beta-divergence.                                                                                   |                |                                                                                                                            | with event sequence signature mining                                                                                         |                      |                                |                                  |
| Wright et al., 2005                                      | Sequential Pattern Mining (cSPADE)                                                                                                                        | PM             | rules, support; 10-fold cross validation which medication was likely to prescribed next. PM for next medication prediction | Identification of relationships between medications and rules; Generation of rules to predict the medication prescribed next | Pattern, Prediction  | pattern in table with weights  | SQL, R + GraphViz                |
| Yan et al., 2016                                         | clustering of patients - similarity of block elements in refined sequences, k-means clustering; Software ProM algorithm to infer and visualize workflow   | Other          | relation between subgroups and a range of diagnoses and procedures                                                         | Proposal of method to identify subgroups of Heart Failure through similarity analysis of event sequence                      | Proposal, Trajectory | trajectory as graph            | not named + ProM (visualization) |
| Zhang and Padman, 2015                                   | clustering of patients (get patients cohorts) - hierarchical clustering with LCS similarity, Silhouette for number of clusters; Markov Chain für Pathway; | MM             | Yes. Viterbi in LOO-CV.                                                                                                    | Proposal of a method to develop care trajectory from EHR                                                                     | Proposal, Trajectory | trajectory in table            | not named                        |
| Zhang, Padman, Wasserman, Patel, Teredesai and Xie, 2015 | clustering of patient sequences (hierarchical: Wards method, similarity: LCS), cluster size as stopping criterion; Markov Chains for pathways per cluster | MM             | Yes / No                                                                                                                   | Proposal of a novel method to automate clinical pathway learning process                                                     | Proposal, Trajectory | trajectory as graph - weighted | not named                        |

Additional File 2: Data Extraction of the included studies

| Study                         | Applied method                                                                                                                                                       | Method - class | Prediction | Stated aim                                                                                            | Aim - class          | Presentation of results        | Program use                       |
|-------------------------------|----------------------------------------------------------------------------------------------------------------------------------------------------------------------|----------------|------------|-------------------------------------------------------------------------------------------------------|----------------------|--------------------------------|-----------------------------------|
| Zhang, Padman and Patel, 2015 | hierarchical clustering (dLCS similarity, hierarchical) and definition of super nodes to reduce complexity; Makov Model for sequences.                               | MM             | No         | Proposal of a method for pathway development; Extraction of common patient centered pathways from EHR | Proposal, Trajectory | trajectory as graph - weighted | not named                         |
| Zhang et al., 2014            | Presentation of visit sequences. Clustering of sequences. Similarity: LCS distance. Clustering: hierachical (not specified); Optimal number of clusters: Silhouette. | Clust.         |            | Analysis of treatment data; Learning of practice-based clinical pathways                              | Trajectory           | trajectory as graph - weighted | not named + gephi (vizualization) |
